# Supplementary material
Source: PubMed Central journal article supplement (PMC3635735)

### Figure Legends for Supplemental Figures

**Supplemental Figure 1. Gigaxonin expression does not alter the levels of Tubulin Binding Cofactor B (TBCB).** Immunoblotting of lysates from control and GAN cells induced to express vector (Vec) or FLAG-Wt-gigaxonin (Gig). The lysates were prepared 72 hr after initiating expression and probed with antibodies to vimentin, FLAG, TBCB, tubulin or actin. Representative blots, 3 experiments.

**Supplemental Figure 2. Mutant (S52G) gigaxonin cannot clear vimentin from cells.** (A) Immunoblotting of lysates from BJ5ta cells prepared at 0, 24, 48 and 72 hr following initiation of FLAG-S52G-gigaxonin expression using antibodies to vimentin, FLAG and actin. Note that although the amount of S52G-gigaxonin increases over time, vimentin levels are unchanged. Representative blots, 3 experiments. (B) BJ5ta cells were fixed at 24, 48 and 72 hr following initiation of FLAG-S52G-gigaxonin expression, and were processed for double Immunofluorescence using antibodies to vimentin and FLAG. Representative images, 4 preparations. Scale, 10  $\mu$ m.

**Supplemental Figure 3. The rod domain is required for vimentin clearance by gigaxonin**  
(A) Double immunofluorescence using anti-vimentin and anti-gigaxonin in  $\text{vim}^{-/-}$  MEFs ( $\text{vim}^{-/-}$ ) and  $\text{vim}^{-/-}$  MEFs expressing FLAG-Full length-vimentin ( $\text{vim}^{-/-}$  FL-vim) or FLAG- $\Delta$ C-vim ( $\text{vim}^{-/-}$   $\Delta$ C-vim) or FLAG-Rod-vim ( $\text{vim}^{-/-}$  Rod-vim) or FLAG- $\Delta$ N-vim ( $\text{vim}^{-/-}$   $\Delta$ N-vim) or FLAG-Head-vim ( $\text{vim}^{-/-}$  N-vim) or FLAG-Tail-vim ( $\text{vim}^{-/-}$  C-vim). Representative images, 4

experiments. Scale, 10  $\mu\text{m}$ . (B) Gigaxonin was expressed for 72 hr in the same cell lines used in (A) and labeled with anti-vimentin and anti-gigaxonin. Note that gigaxonin expression caused the clearance of FLAG-FL-vimentin, FLAG- $\Delta\text{C}$ -vim, FLAG-Rod-vim and FLAG- $\Delta\text{N}$ -vim. In contrast the FLAG-Head-vim and FLAG-Tail-vim were not cleared. Representative images, 4 experiments. Scale, 10  $\mu\text{m}$ .

**Supplemental Figure 4. Gigaxonin expression causes clearance of neuronal specific IF networks.** (A) PC12 cells that were expressing vector (upper panel) or FLAG-Wt-gigaxonin (lower panel) for 72 hr were stained with anti-peripherin and anti-FLAG. Scale, 10  $\mu\text{m}$ . (B) Immunofluorescence of PC12 cells that were expressing vector (upper panel) or FLAG-Wt-gigaxonin (lower panel) treated with NGF and stained with anti-FLAG and anti-peripherin. Representative images, 4 preparations. Scale, 20  $\mu\text{m}$ . (C) SH-SY-5Y cells expressing vector (upper panel) or FLAG-Wt-gigaxonin for 72 hr (lower panel) were stained with anti-FLAG and anti-NF-L. Scale, 10  $\mu\text{m}$ . (D) SH-SY-5Y cells that were expressing vector and treated with RA+BDNF (upper panel) or expressing FLAG-Wt-gigaxonin and treated with RA+BDNF (lower panel) were fixed and stained with anti-FLAG and anti-NF-L. Representative images, 4 preparations. Scale, 20  $\mu\text{m}$ .

**Supplemental Figure 5. Aggregates of peripherin and neurofilaments in DRG neurons of  $\text{GAN}^{-/-}$  mice.** Immunofluorescence of NF-M and peripherin in DRG neuron cultures derived from Wt (upper panel) or Gigaxonin-deficient embryos (middle panel) at 3 days *in vitro*. As expected, NF are most concentrated in the cell bodies of both normal and  $\text{GAN}^{-/-}$  neurons, but abnormal

45

aggregates can be detected in the neurites derived from  $GAN^{-/-}$  mice (asterisks). These aggregates are reminiscent of those associated with the axonal swellings detected in GAN patients' neurons. Scale 50  $\mu\text{m}$ . Enlarged images of an aggregate in  $GAN^{-/-}$  mouse DRG (indicated by a white rectangle) are shown in the bottom panel.

# SUPPLEMENTAL FIGURE 1

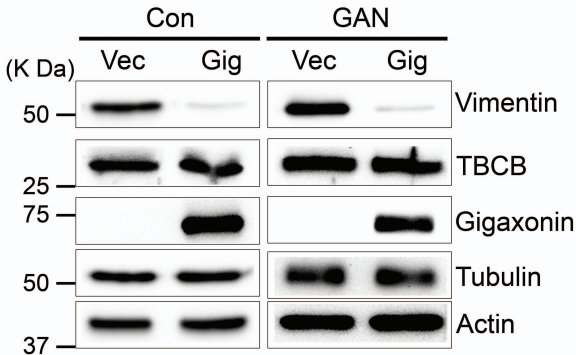

# SUPPLEMENTAL FIGURE 2

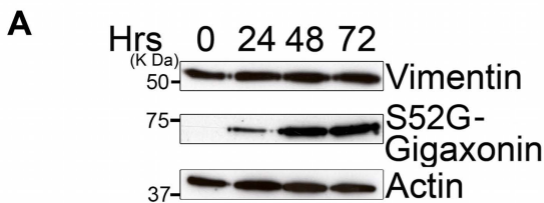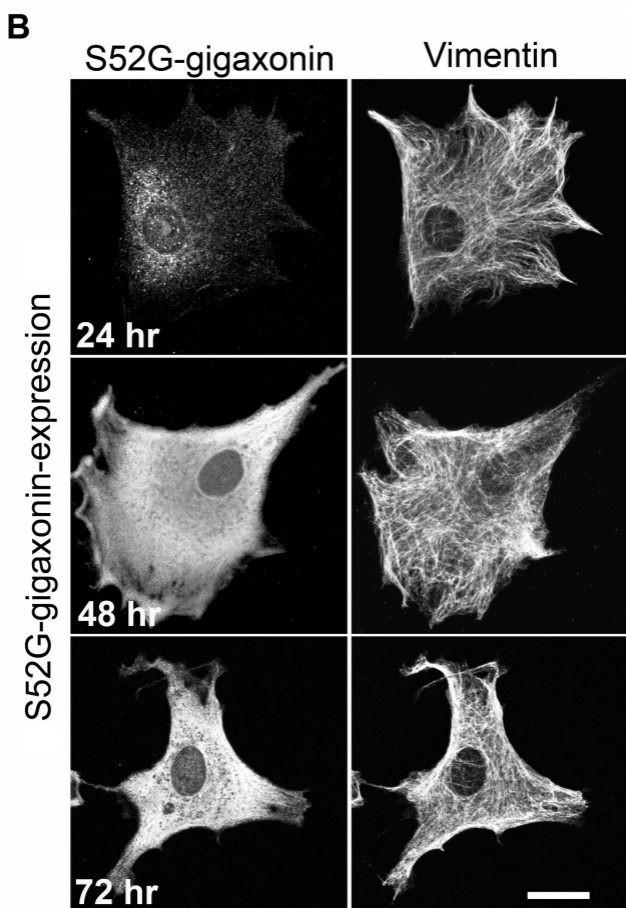

# SUPPLEMENTAL FIGURE 3

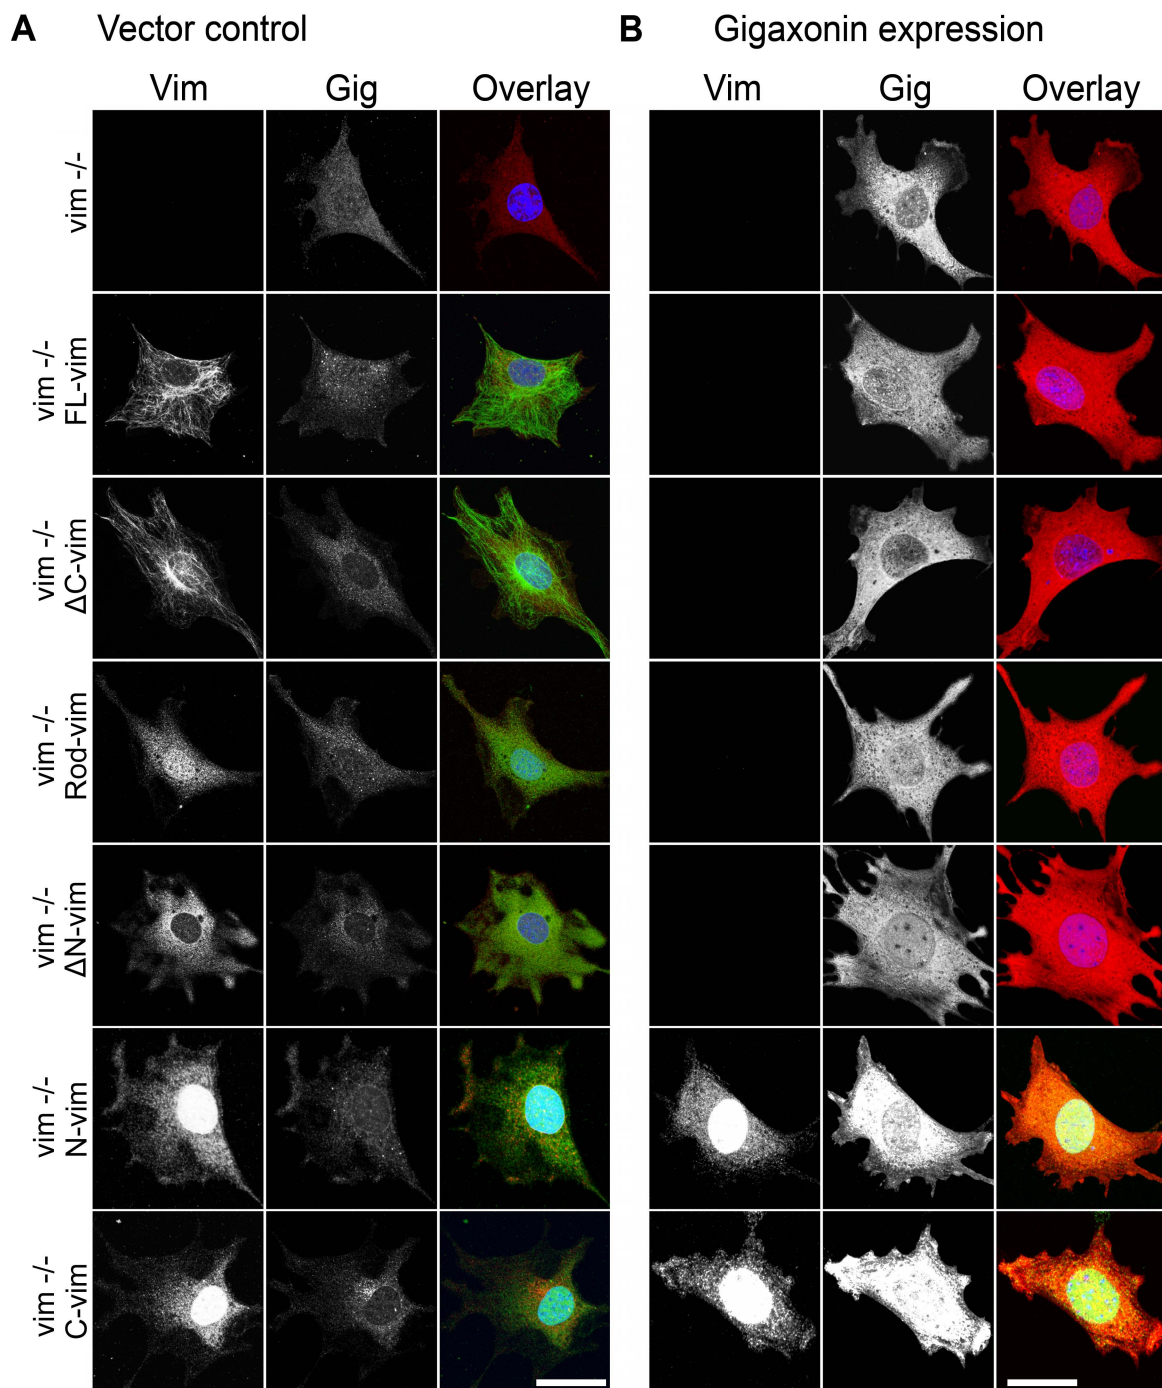

# SUPPLEMENTAL FIGURE 4

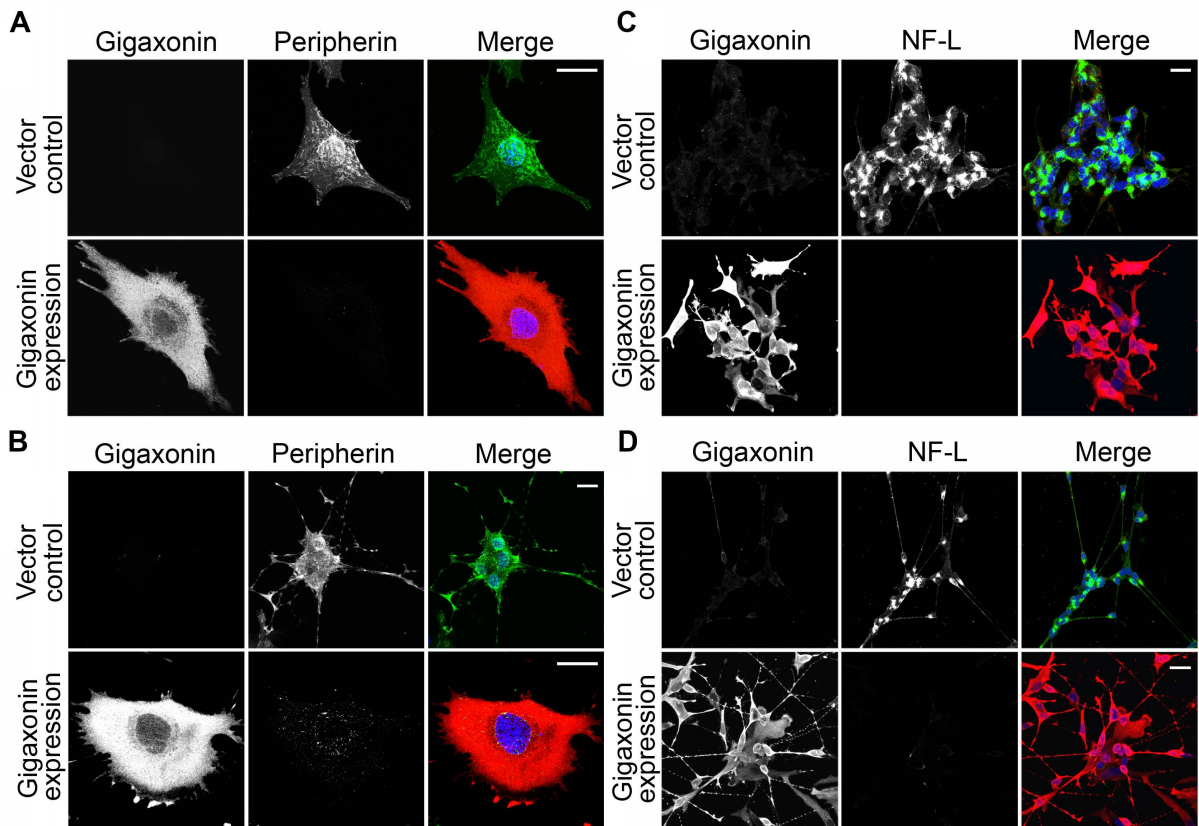

SUPPLEMENTAL FIGURE 5

NF-M

Peripherin

Merge

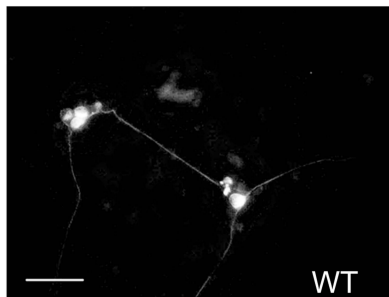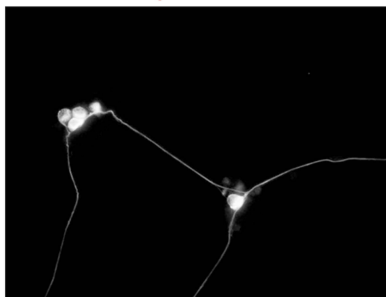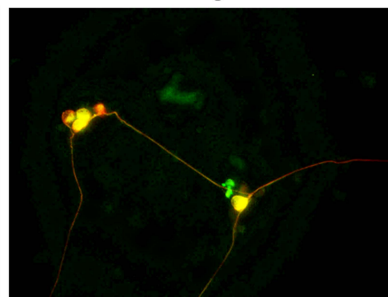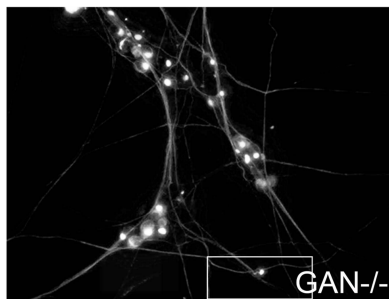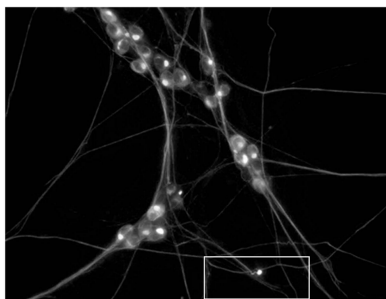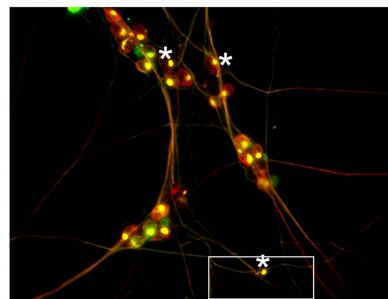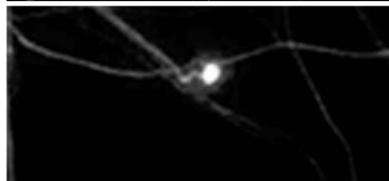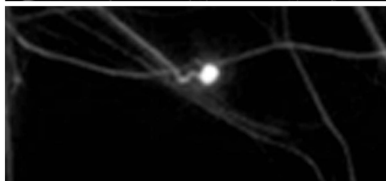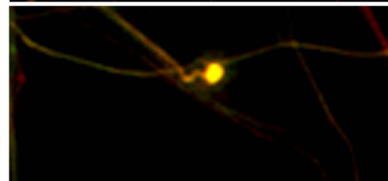

Supplement: JCI66387sd.pdf [file JCI66387sd.pdf]
